# Supplementary material for: Diels–Alder reactions between cyclopentadiene analogs and benzoquinone in water and their application in the synthesis of polycyclic cage compounds
Source: Royal Society of Chemistry journal article supplement (doi:10.1039/c9ra09745g), 2020-01-01

Supporting information for

**Diels-Alder Reactions between Cyclopentadiene Analogs and Benzoquinone in Water and Application in Synthesis of Polycyclic Cage Compounds**

Yijun Shi<sup>\*a,b</sup>, Xuejing Liu<sup>\*a</sup>, Ying Han<sup>a</sup>, Peng Yan<sup>a</sup>, Fusheng Bie<sup>a</sup> and Han Cao<sup>a</sup>

<sup>a</sup> Engineering and Technology Research Institute of Lunan Coal Chemical, Zaozhuang University, Beian Road, Zaozhuang 277160, Shandong Province, China.

<sup>b</sup> College of Chemistry, Chemical Engineering and Materials Science, Zaozhuang University, Beian Road, Zaozhuang 277160, Shandong Province, China.

E-mail: 673230386@qq.com

**<sup>1</sup>H NMR spectra of 2**

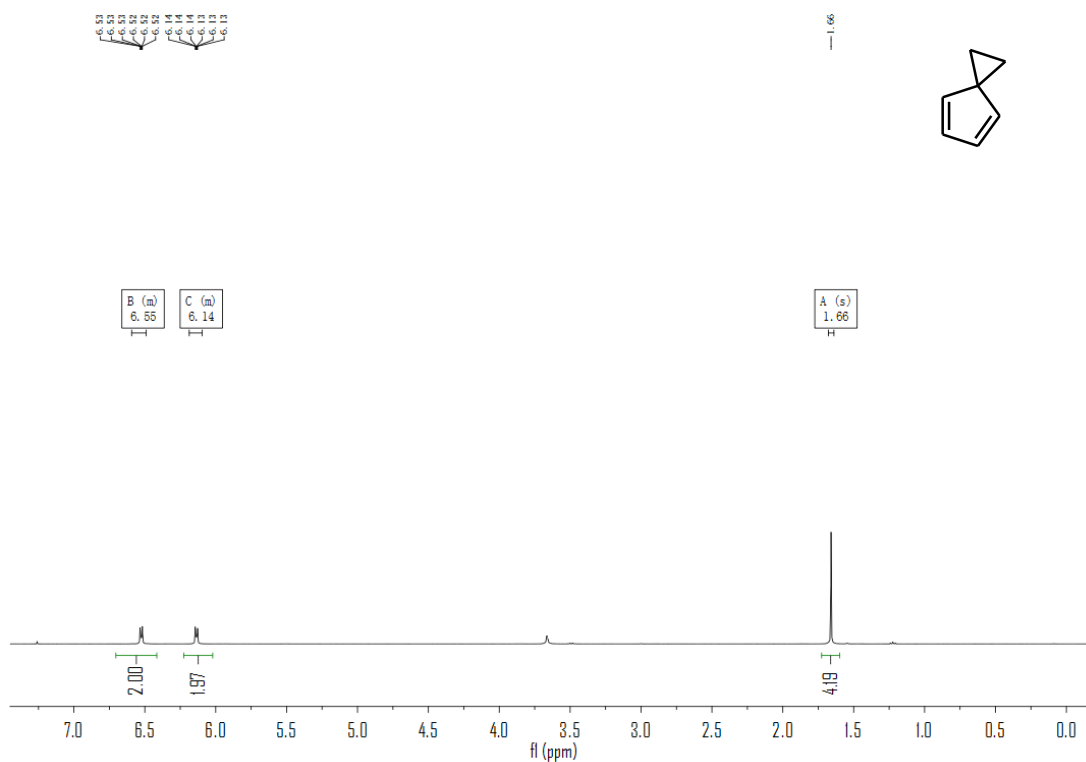

### <sup>1</sup>H NMR spectra of 4

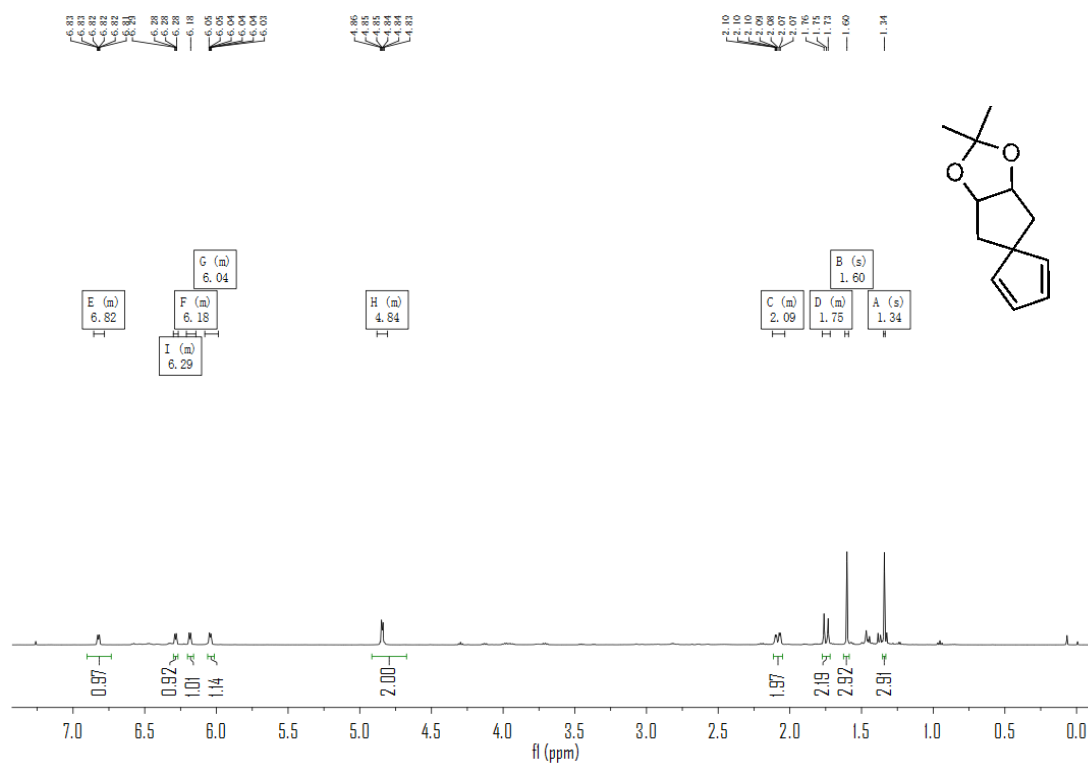

### <sup>1</sup>H NMR spectra of 5

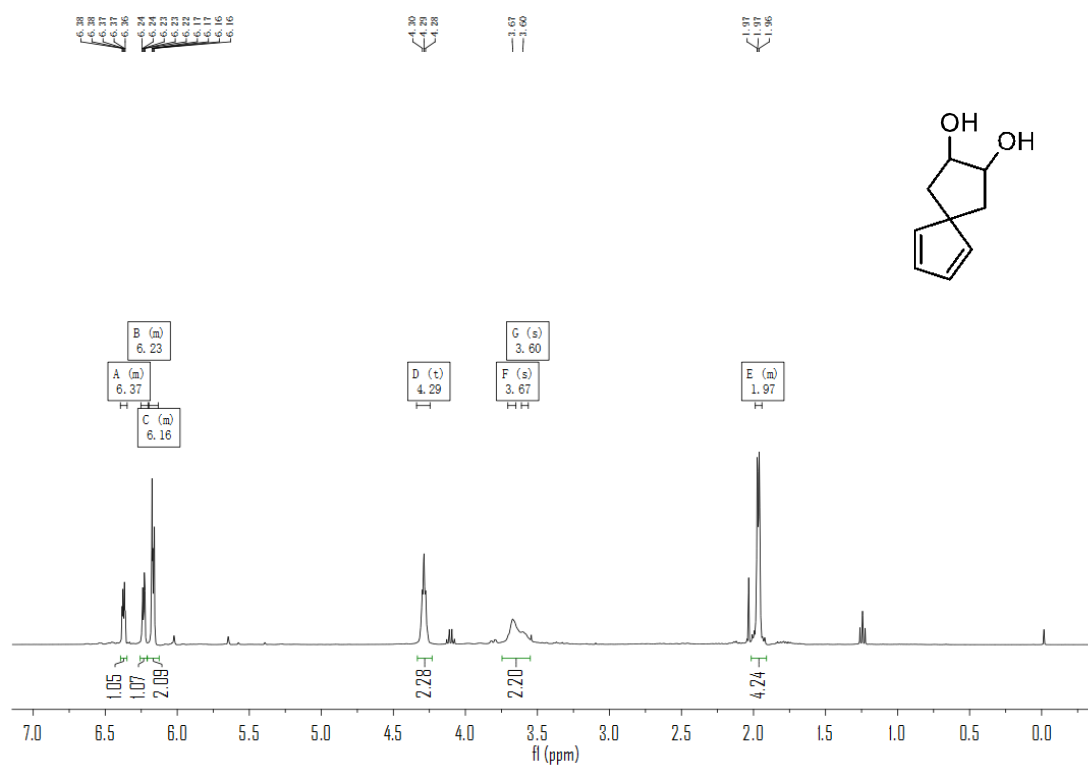

### $^1\text{H}$ NMR spectra of 2,2'-bi(p-benzoquinone)

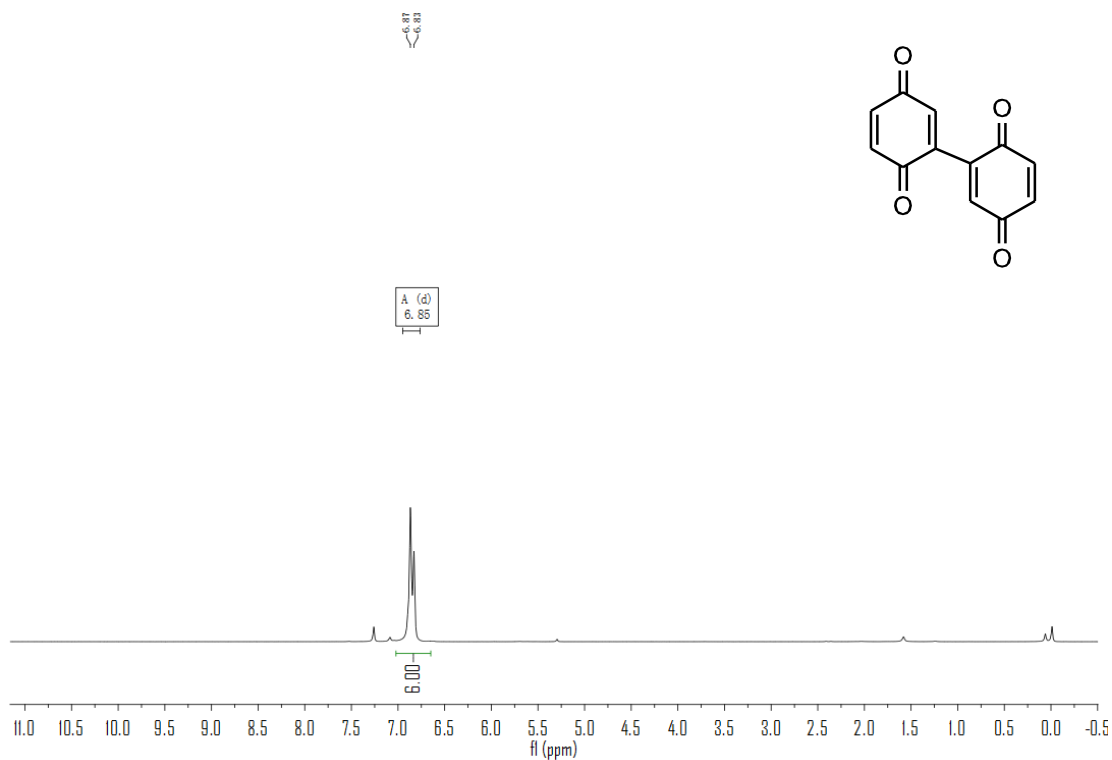

### $^1\text{H}$ NMR spectra of 6

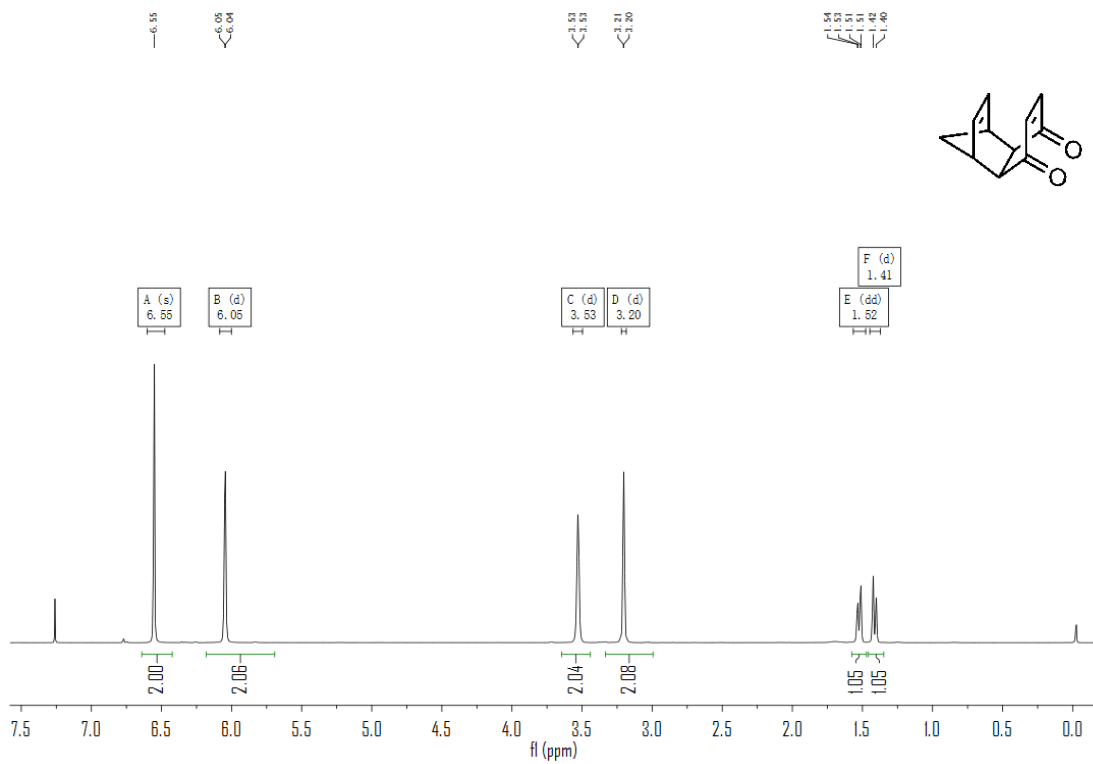

### <sup>13</sup>C NMR spectra of 6

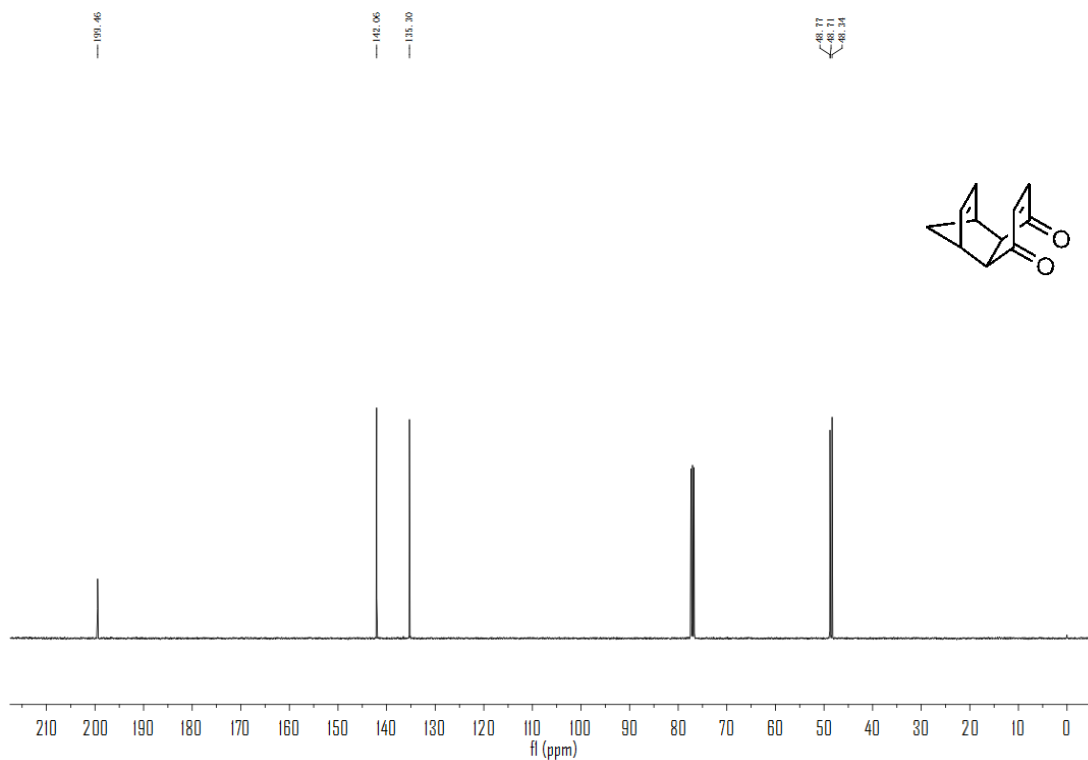

### <sup>1</sup>H NMR spectra of 7

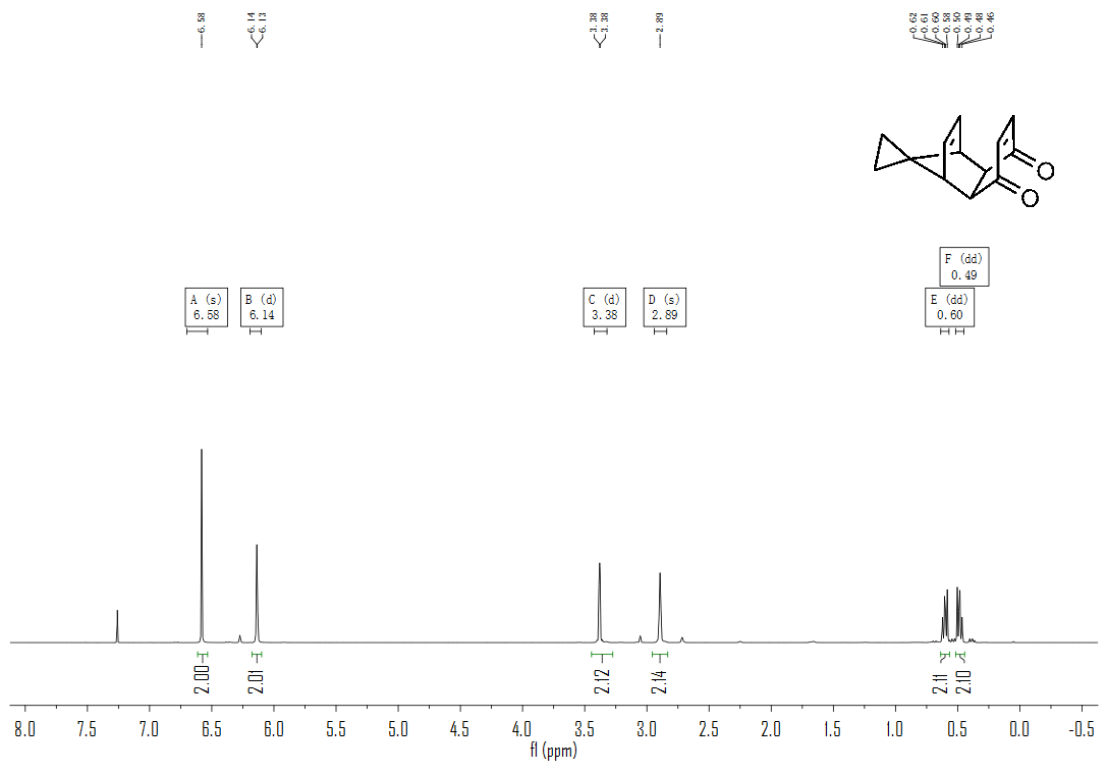

**<sup>13</sup>C NMR spectra of 7**

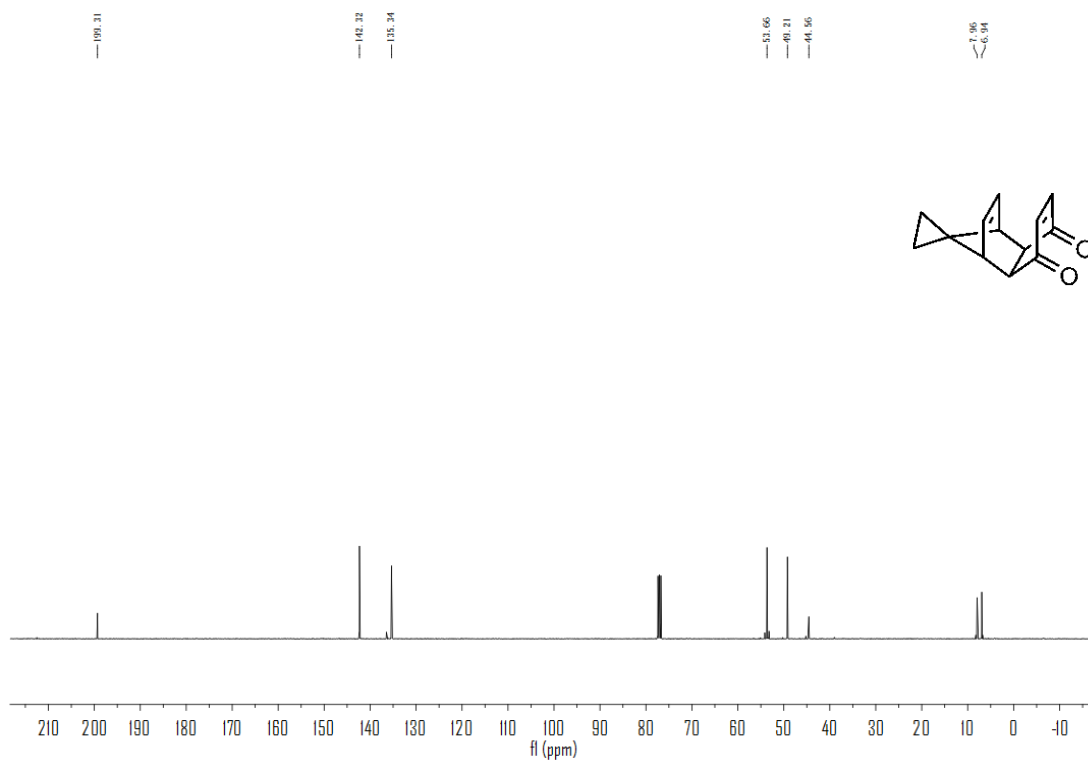

**<sup>1</sup>H NMR spectra of 8**

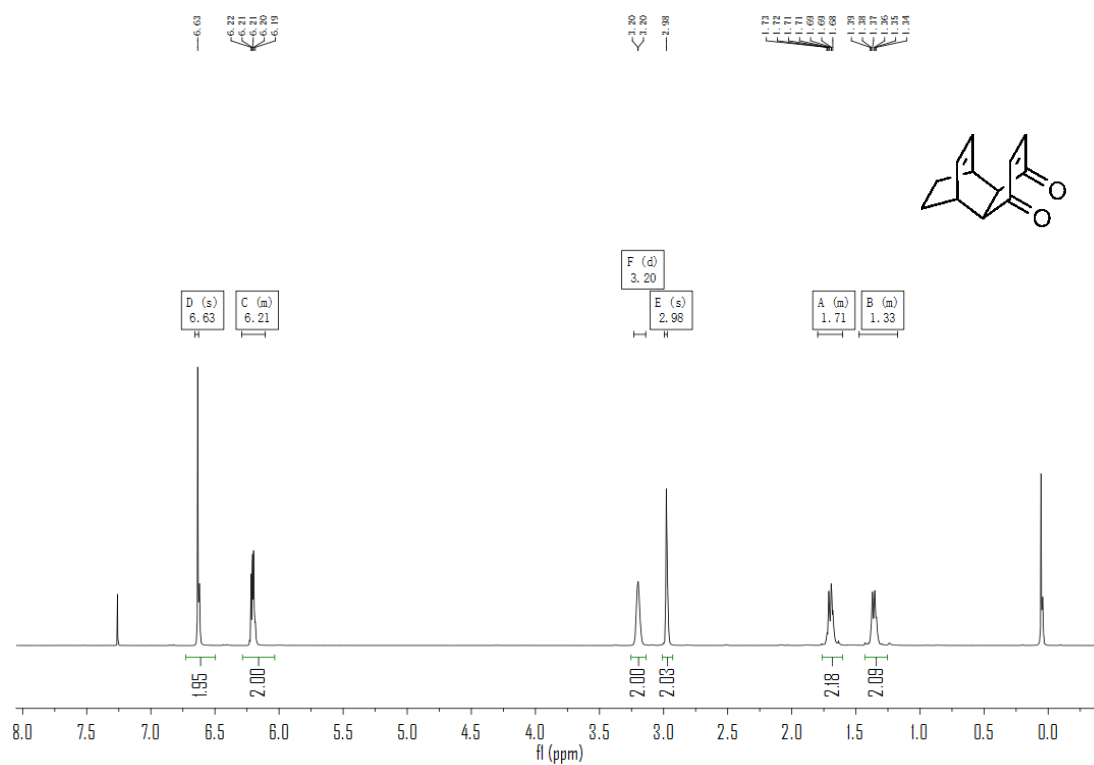

### <sup>13</sup>C NMR spectra of 8

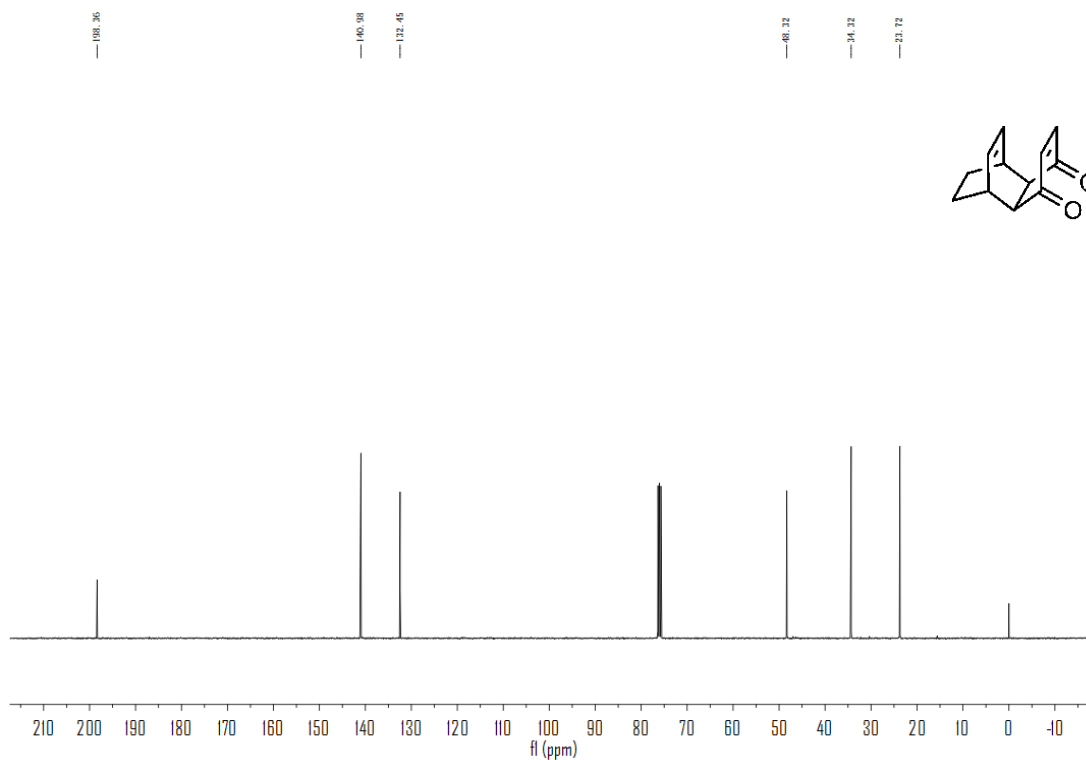

### <sup>1</sup>H NMR spectra of 9

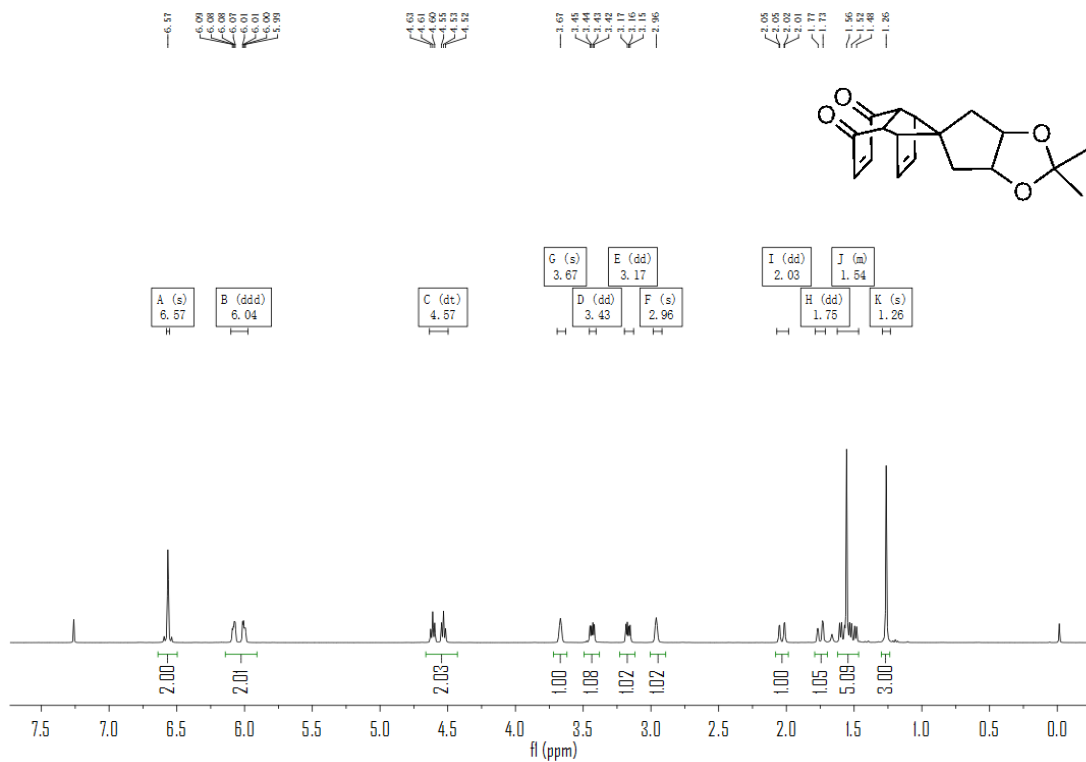

### <sup>13</sup>C NMR spectra of 9

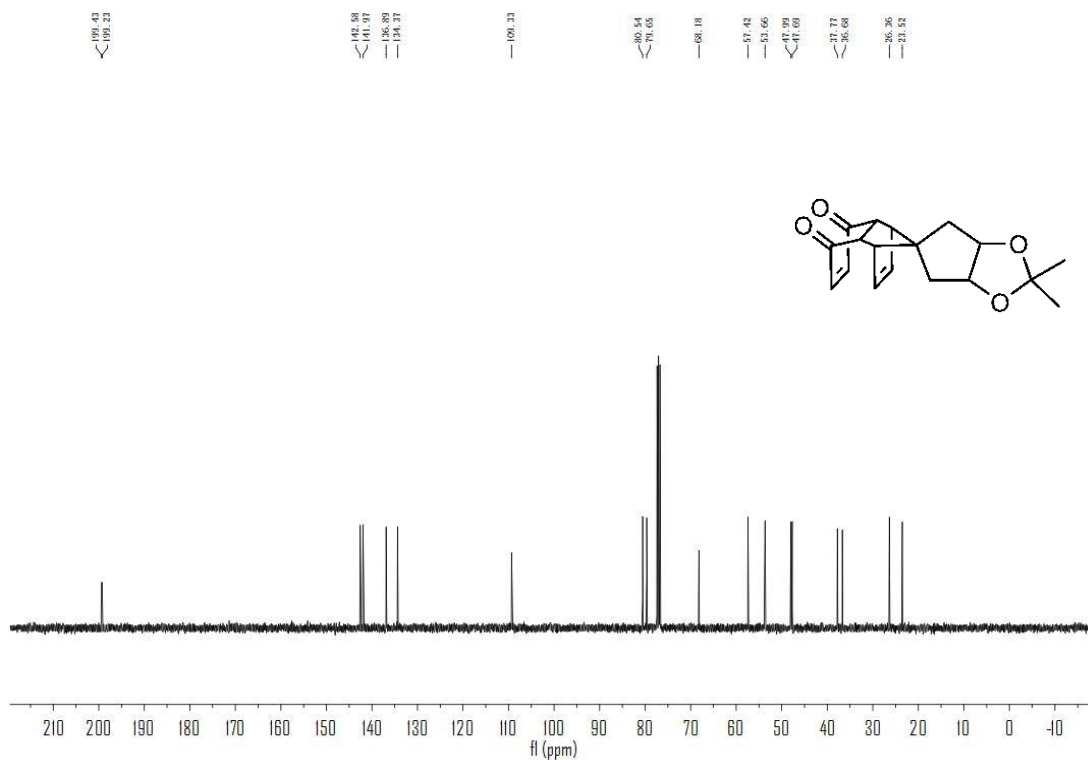

### <sup>1</sup>H NMR spectra of 10

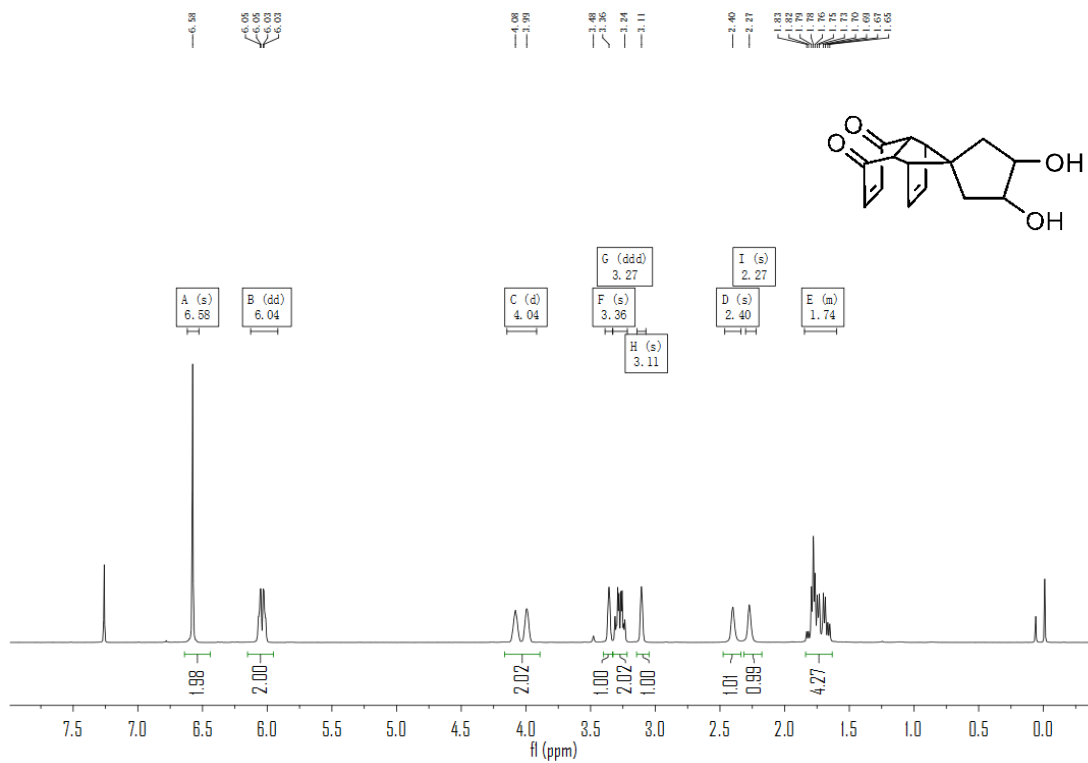

### <sup>13</sup>C NMR spectra of 10

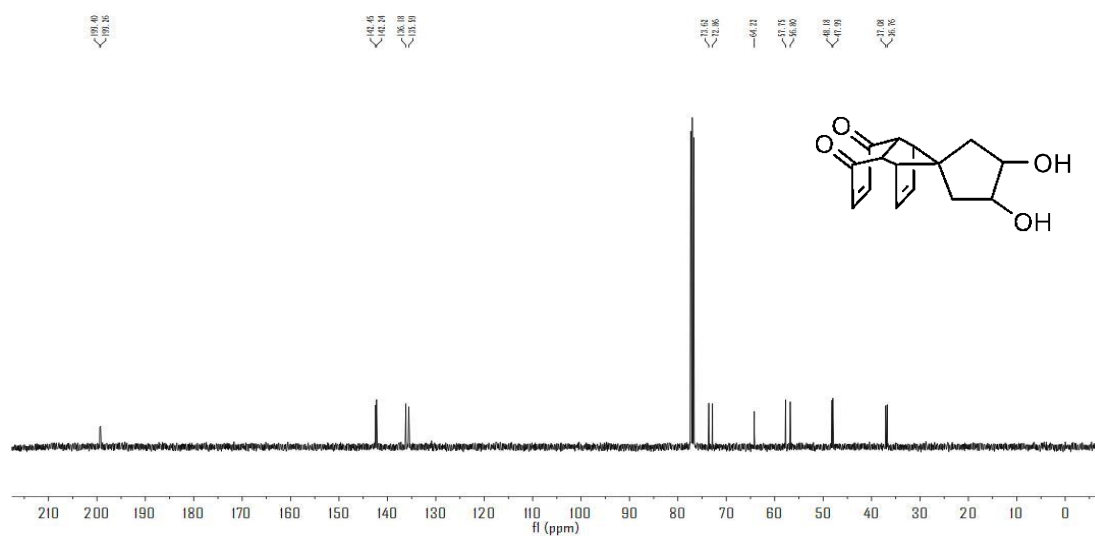

### MS of 10

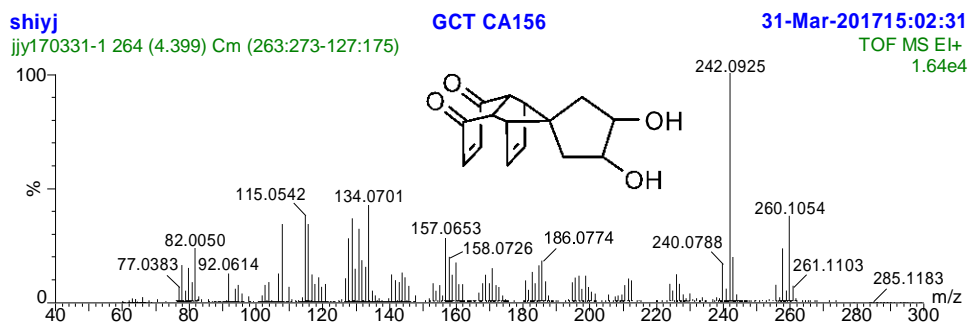

### <sup>1</sup>H NMR spectra of 11

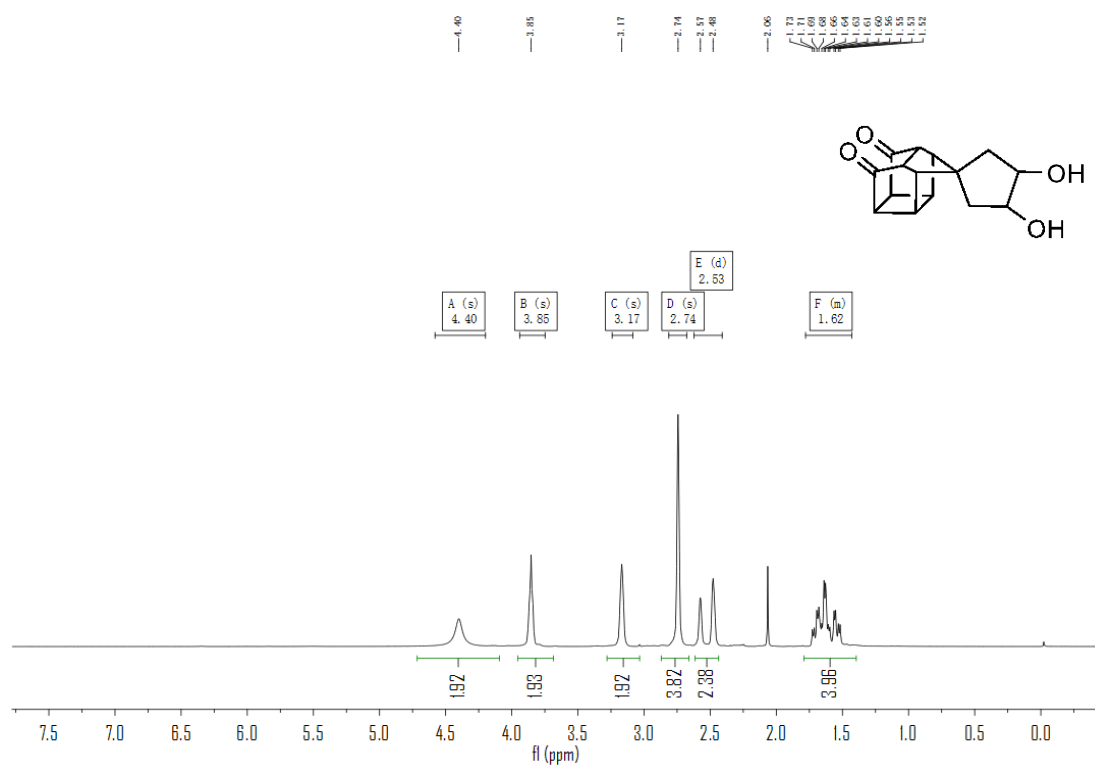



### <sup>13</sup>C NMR spectra of 11

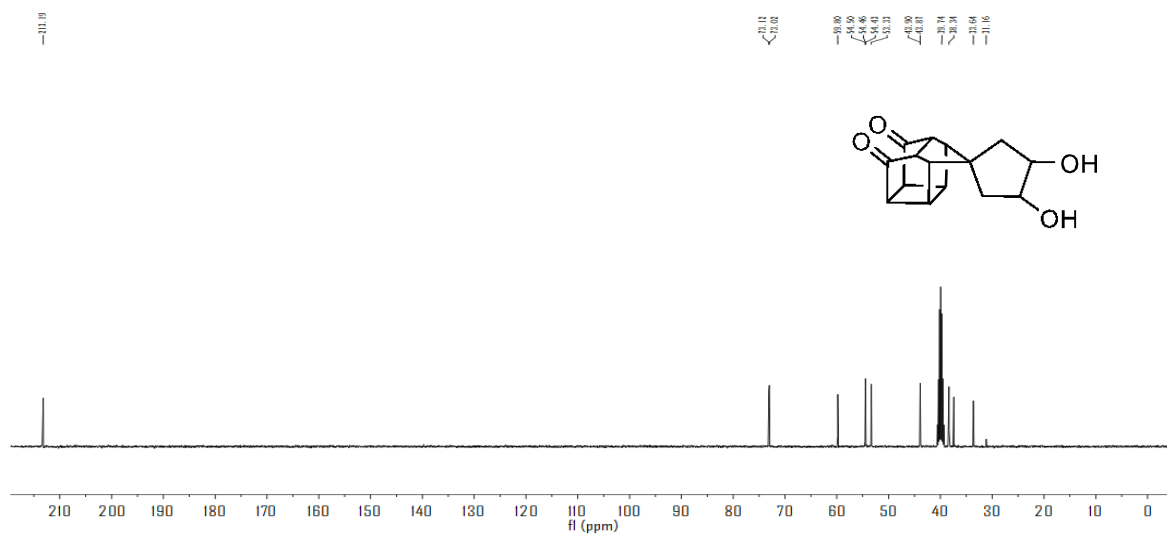

### MS of 11

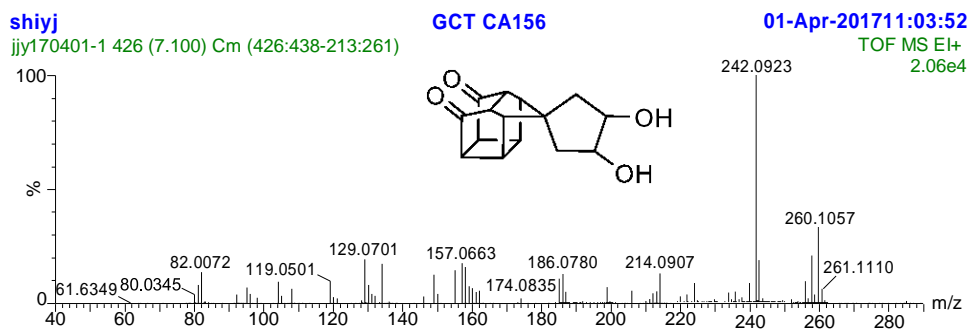

### <sup>1</sup>H NMR spectra of 12

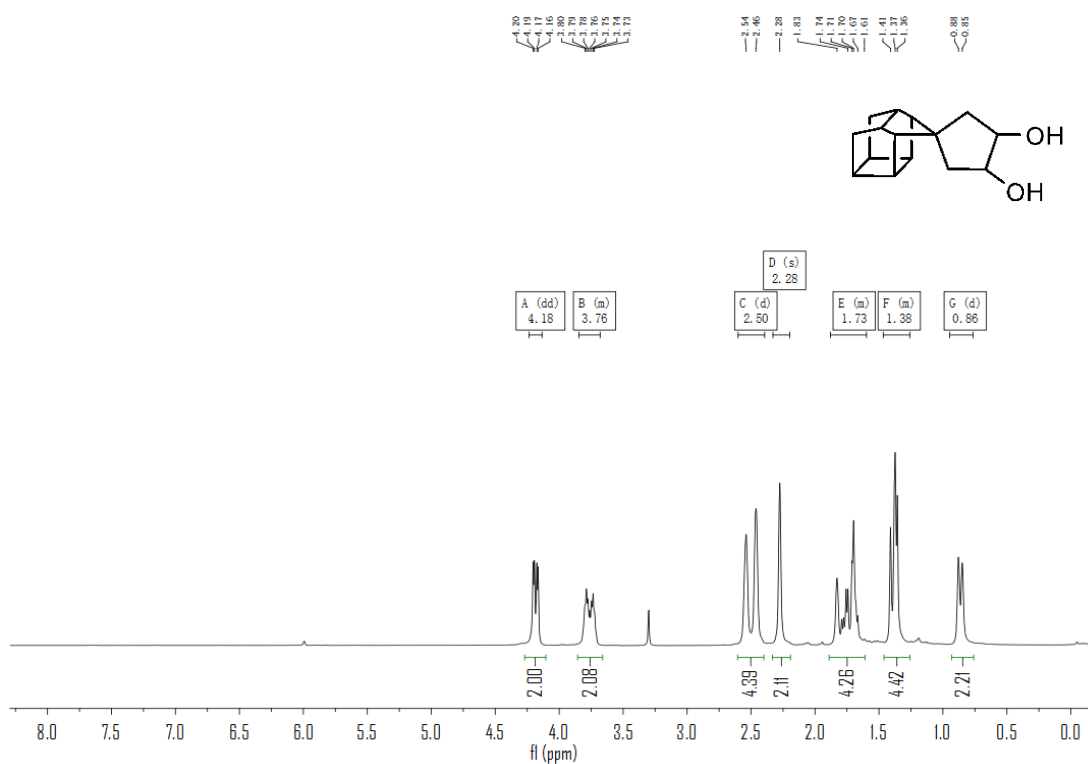

### <sup>13</sup>C NMR spectra of 12

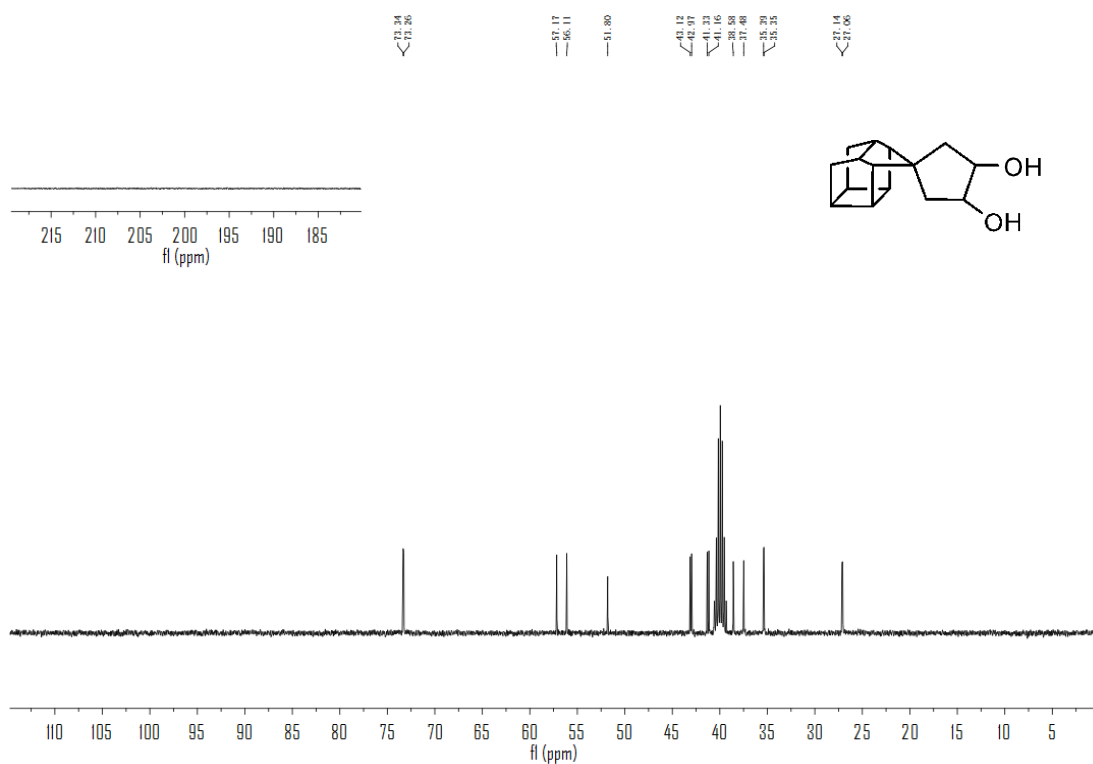

### <sup>1</sup>H NMR spectra of D-A-1

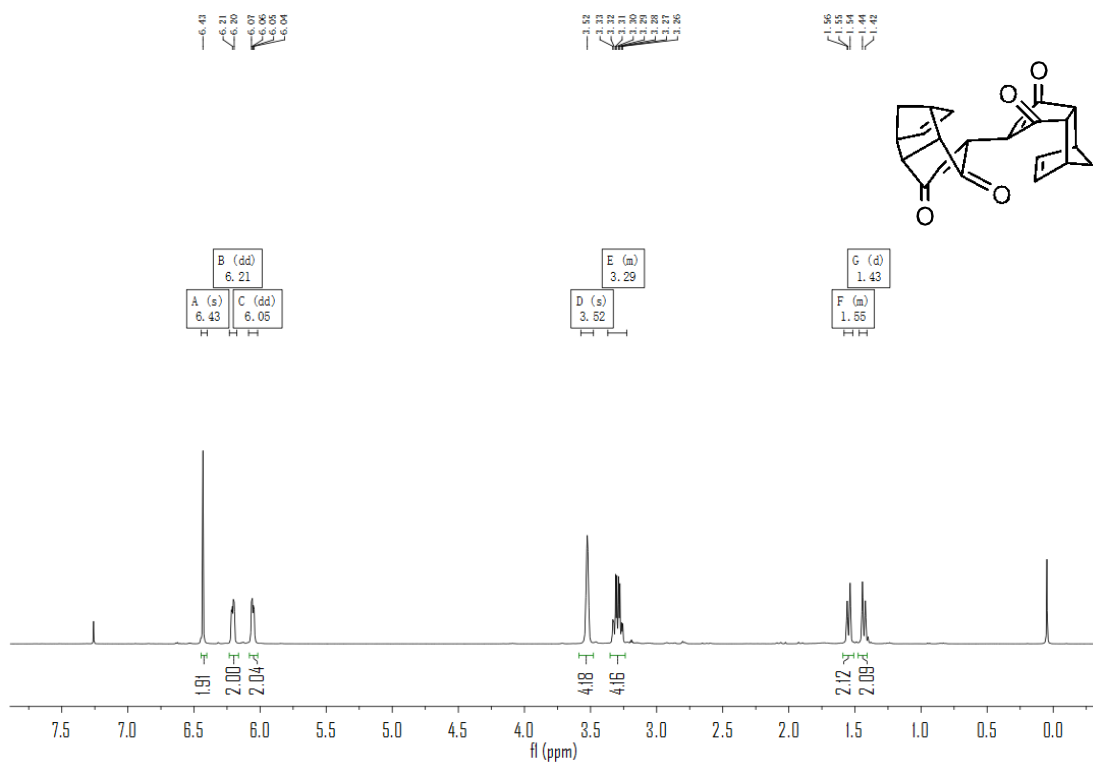

### <sup>13</sup>C NMR spectra of D-A-1

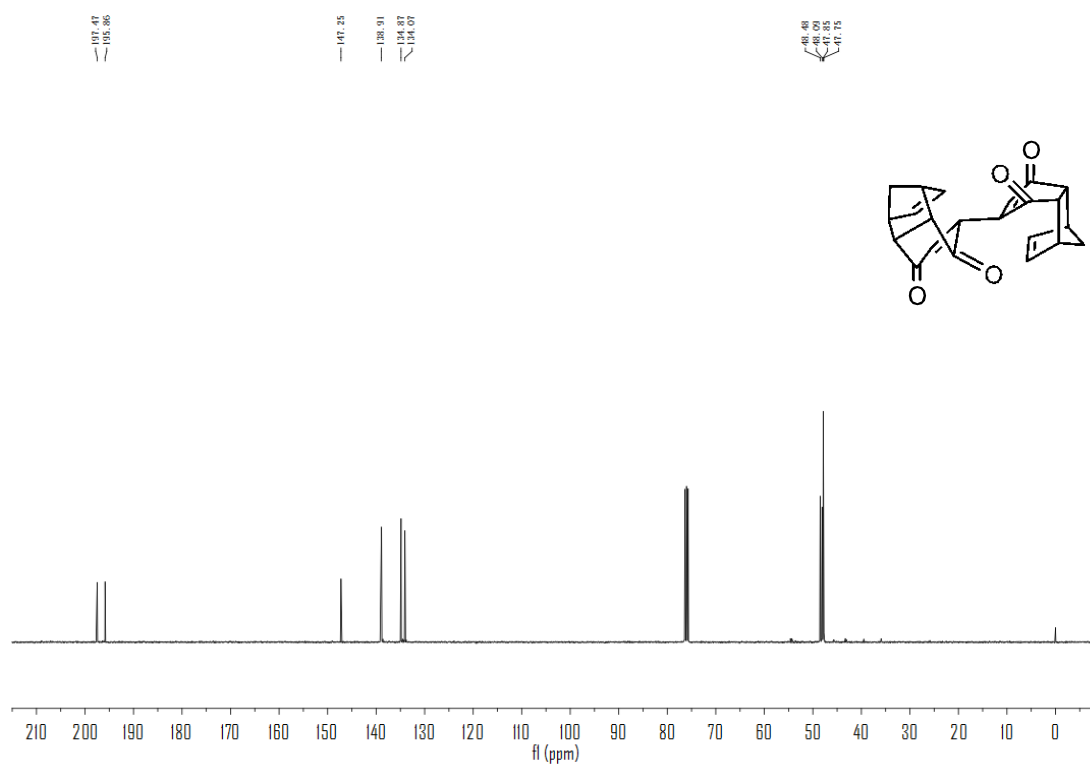

### MS of D-A-1

Item name: 2018090701 Channel name: 1: Average Time 0.2100 min : TOF MS (100-1200) ESI+ ...  
Item description: T-1

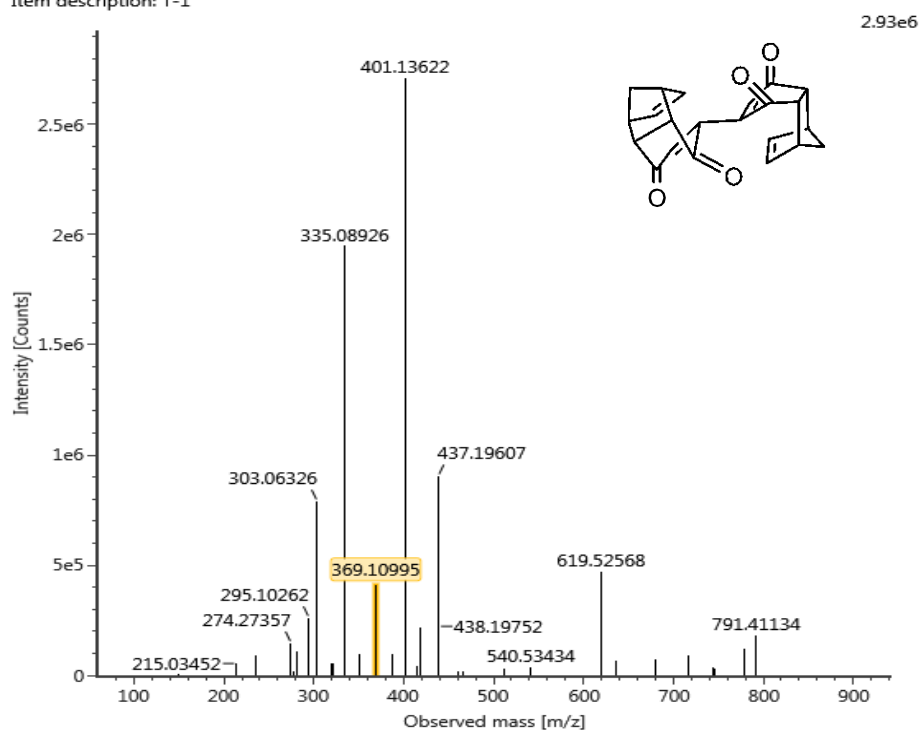

### <sup>1</sup>H NMR spectra of D-A-2

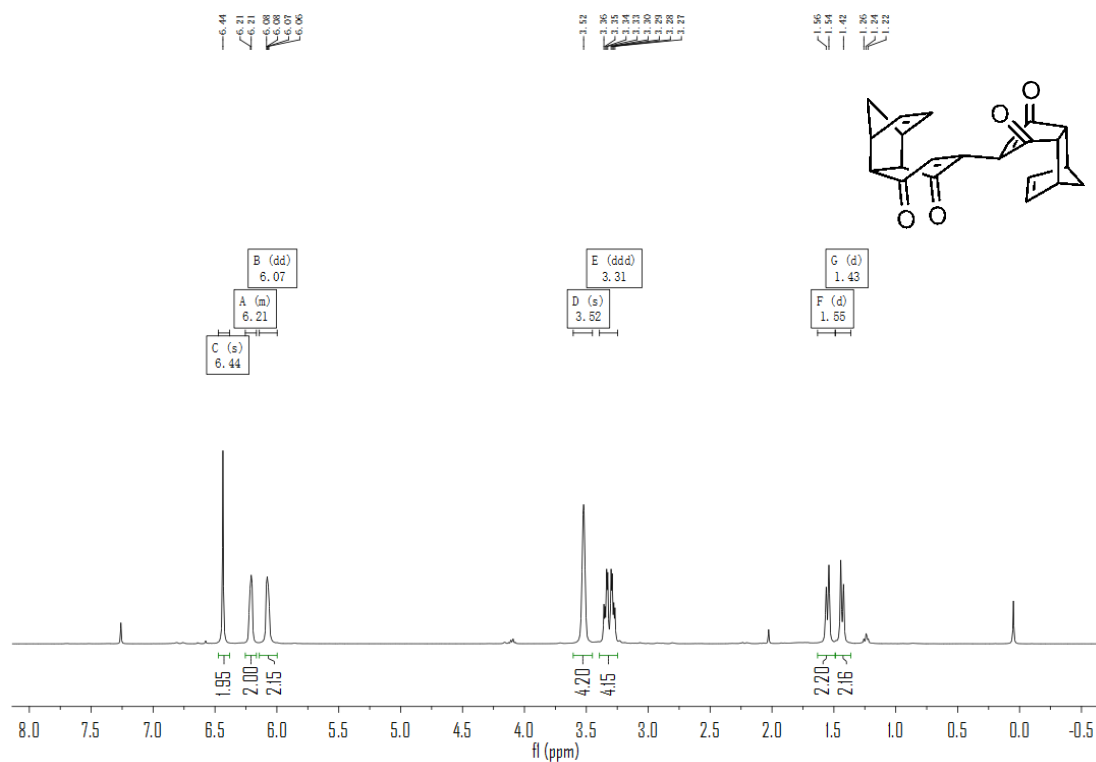

### <sup>13</sup>C NMR spectra of D-A-2

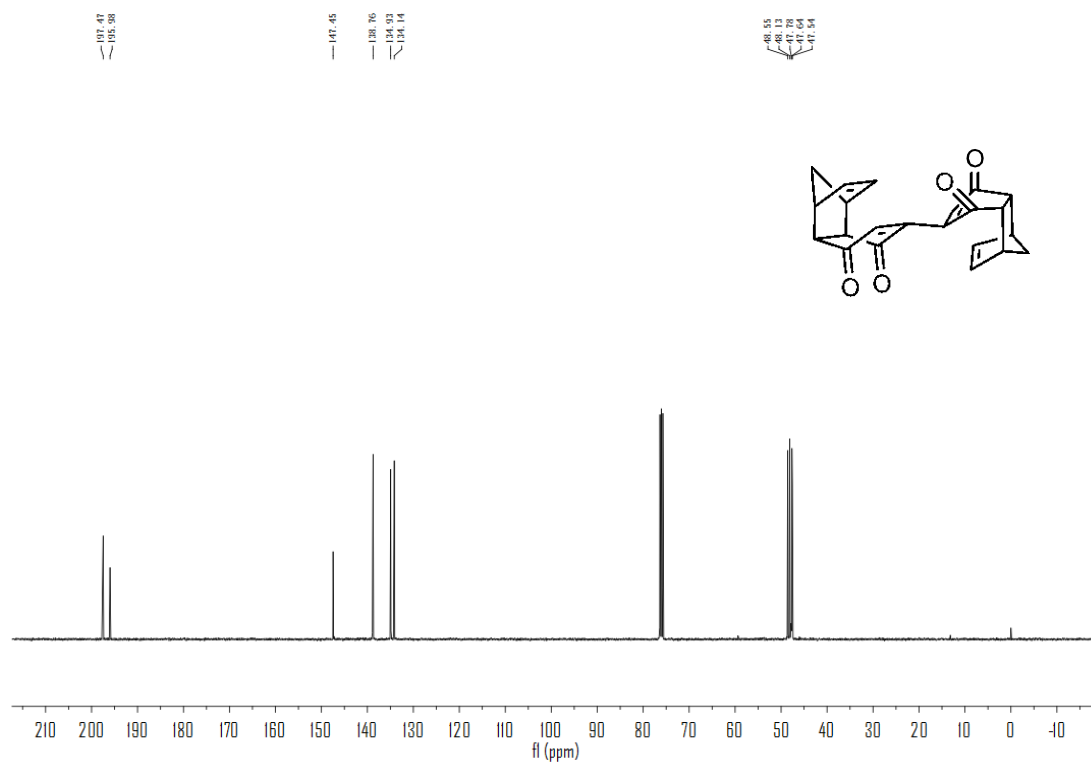

## MS of D-A-2

Item name: 2018090702 Channel name: 1: Average Time 0.2012 min : TOF MS (100-1200) ESI+ ...  
 Item description: T-2

9.35e6

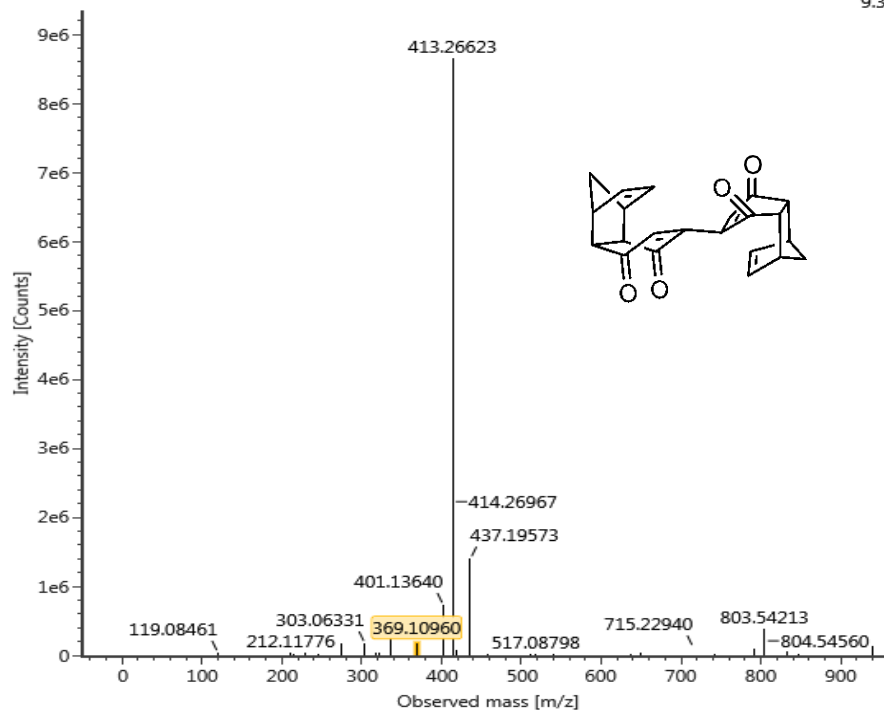

## <sup>1</sup>H NMR spectra of HV-1

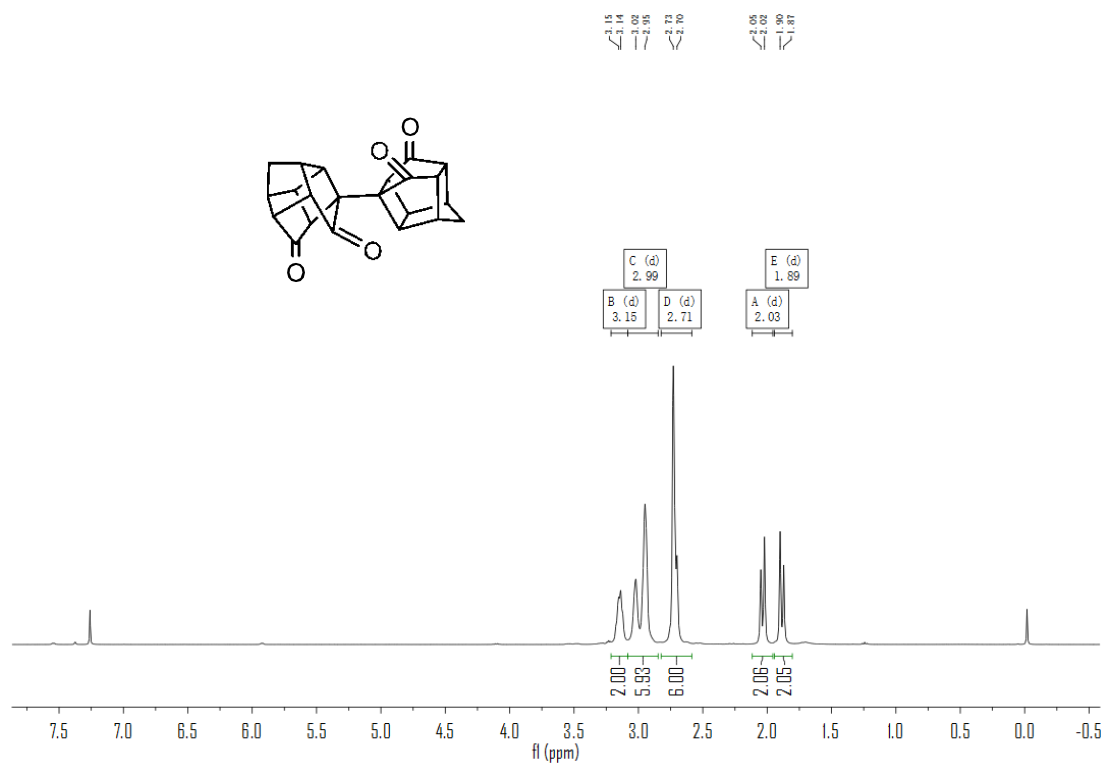

### <sup>13</sup>C NMR spectra of HV-1

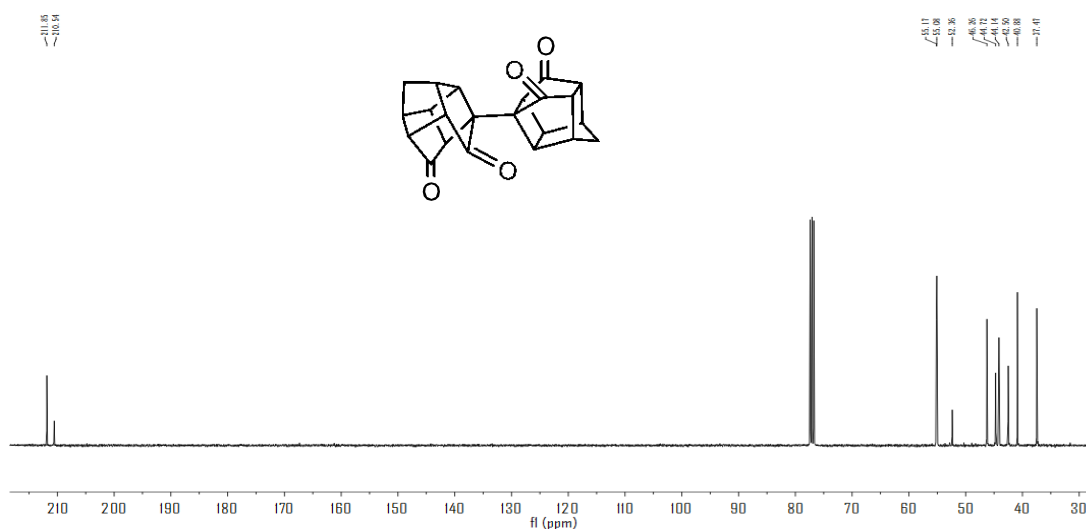

### MS of HV-1

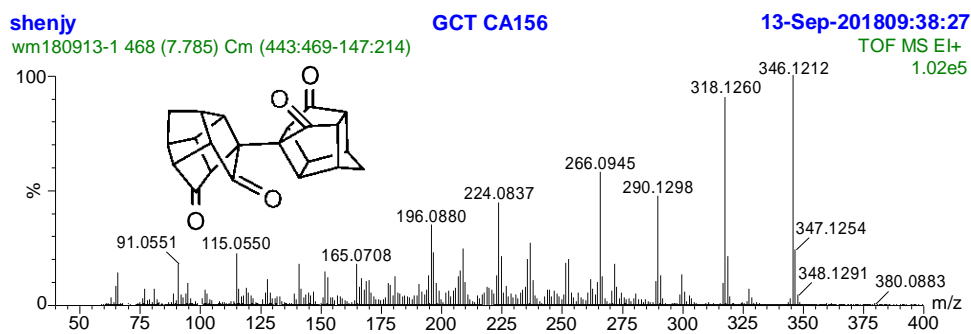

### <sup>1</sup>H NMR spectra of HV-2

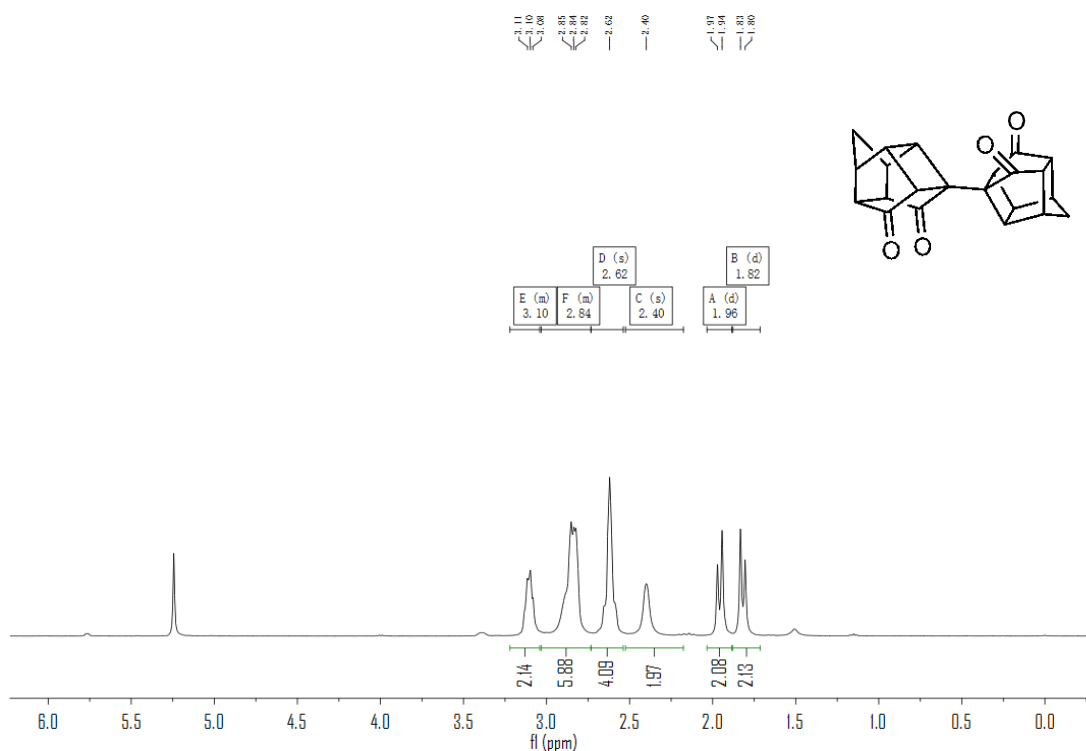

### <sup>13</sup>C NMR spectra of HV-2

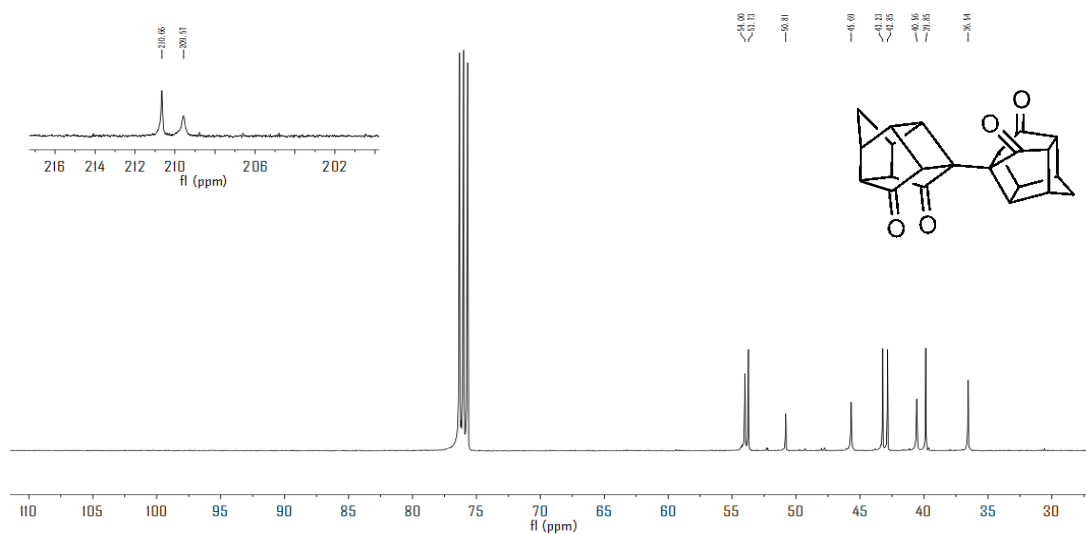

### MS of HV-2

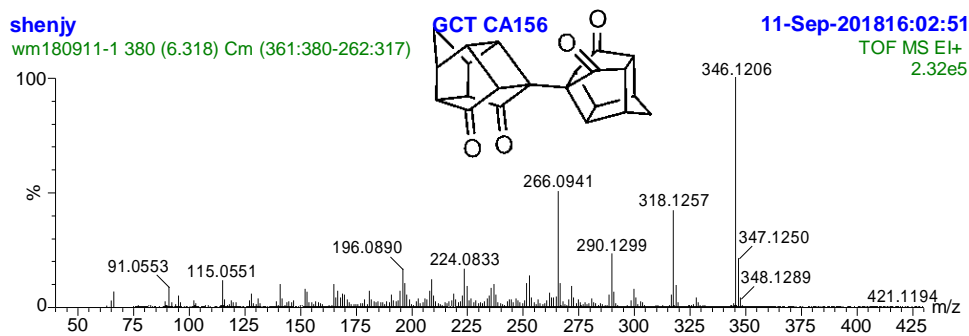

### <sup>1</sup>H NMR spectra of D-A-3

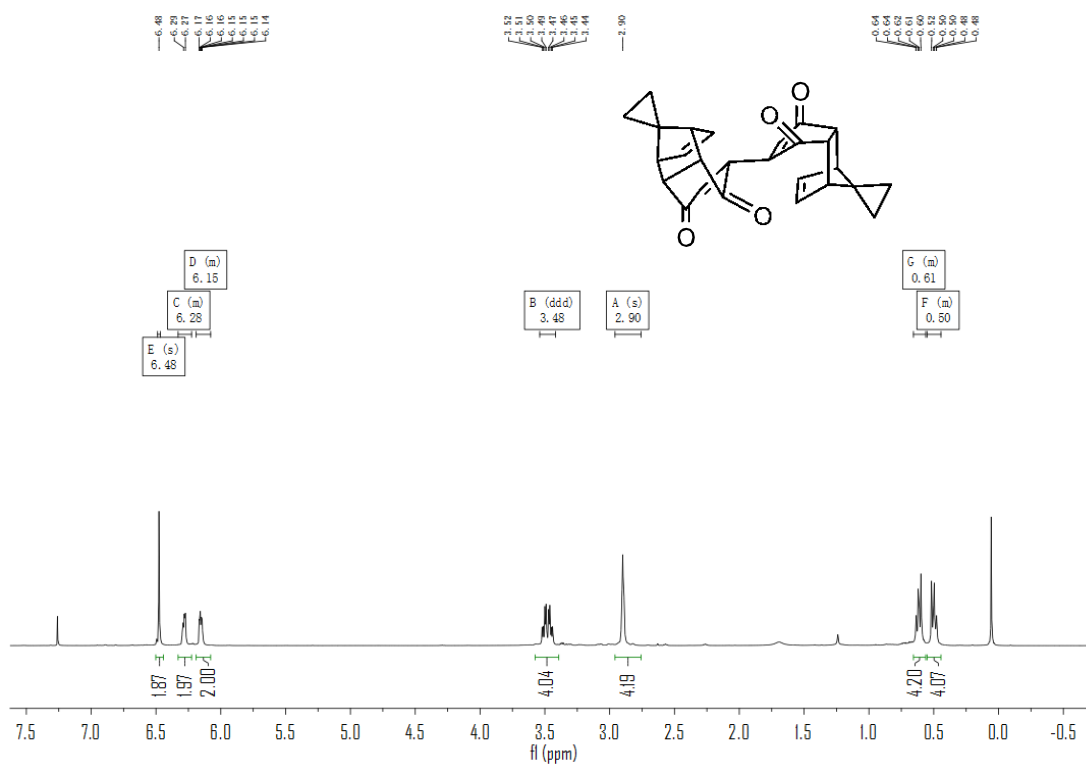

### <sup>13</sup>C NMR spectra of D-A-3

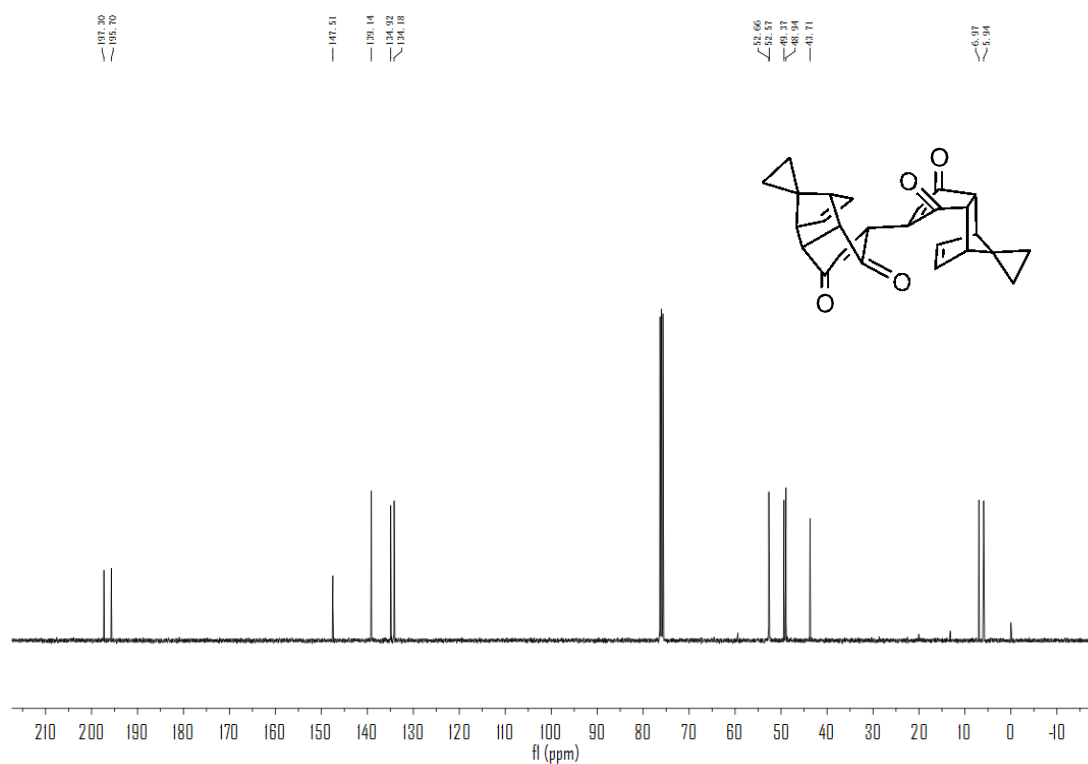

### MS of D-A-3

Item name: 2018102203 Channel name: 1: Average Time 0.1975 min : TOF MS (100-1200) ESI...  
Item description: ZTB-TS-1

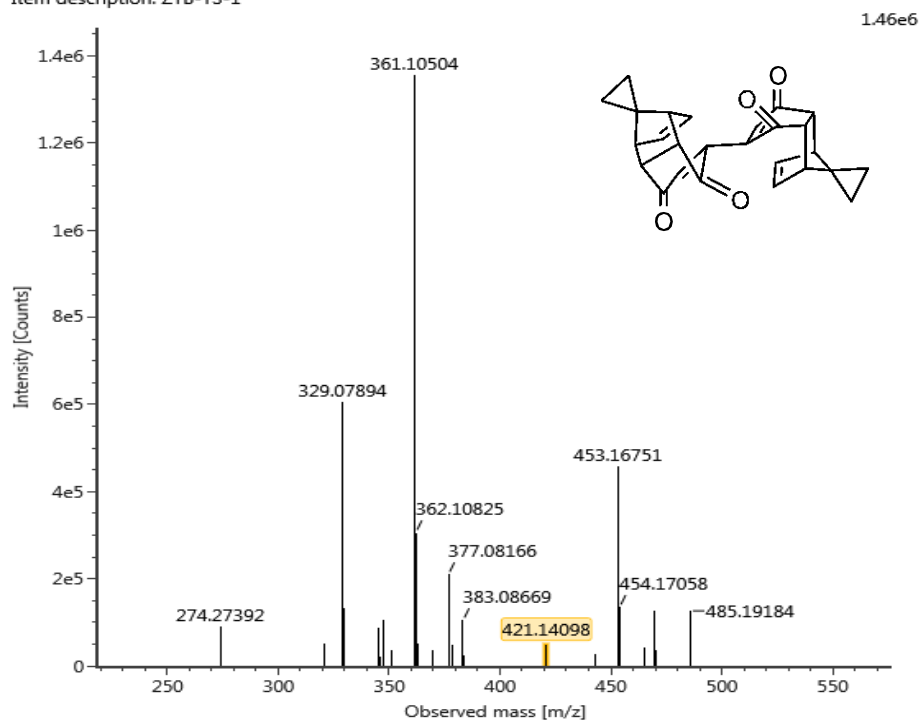



### <sup>1</sup>H NMR spectra of D-A-4

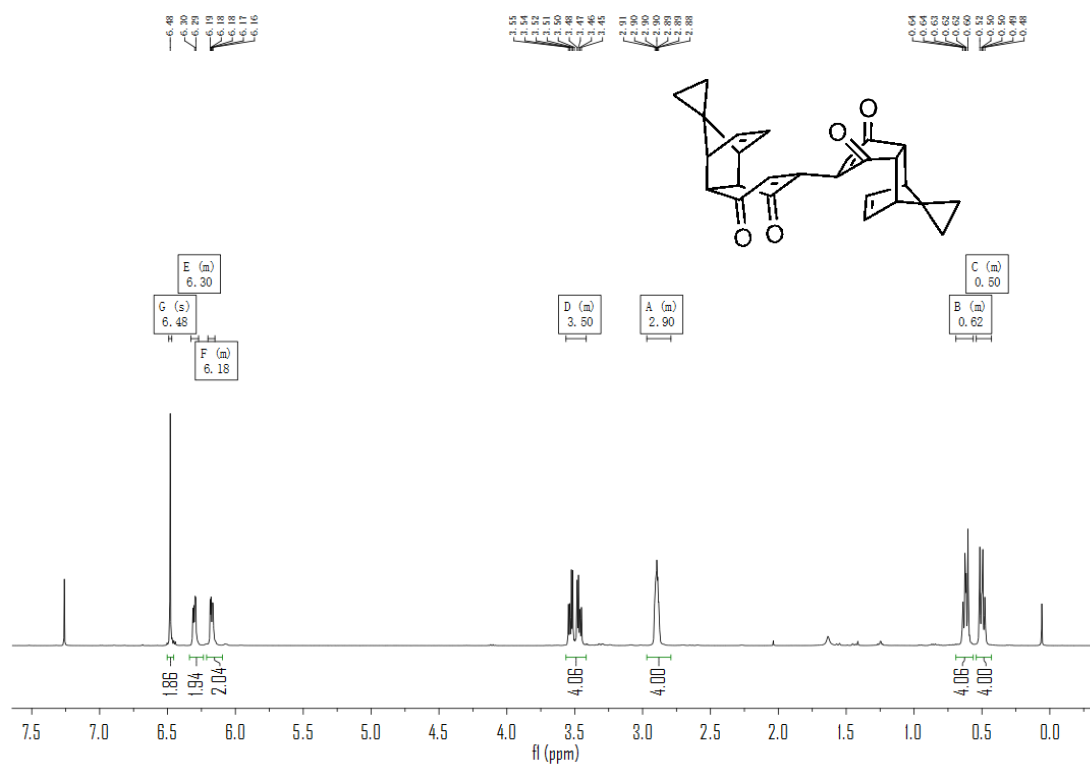

### <sup>13</sup>C NMR spectra of D-A-4

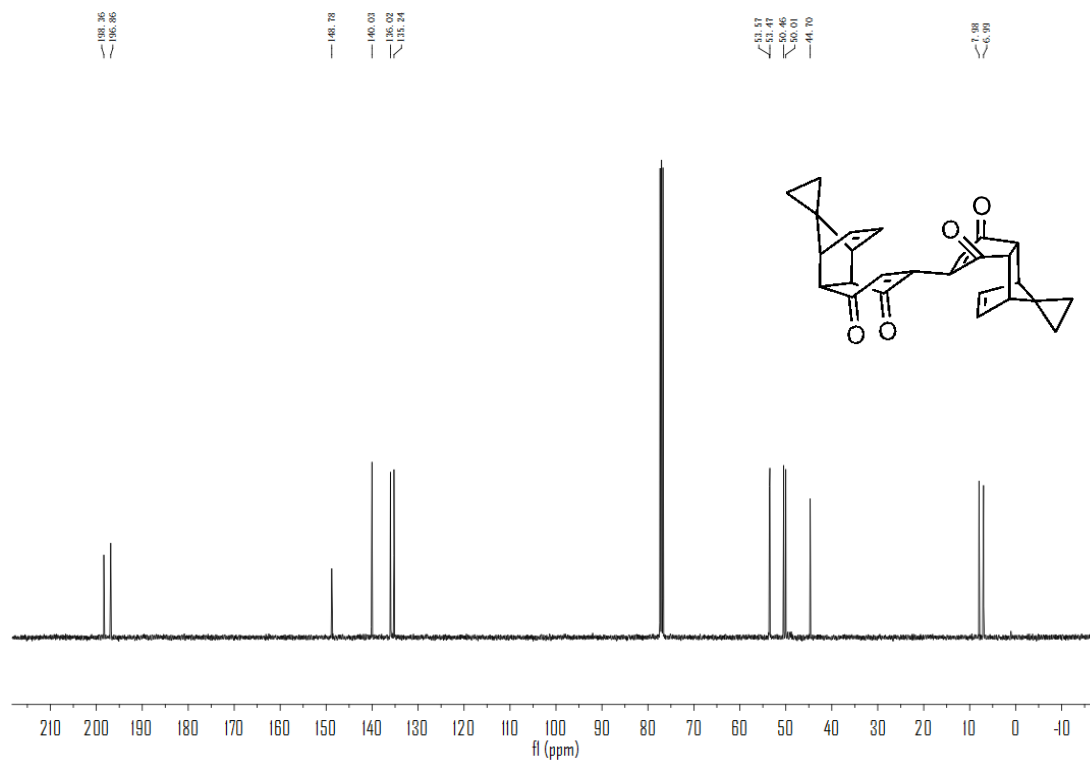

## MS of D-A-4

Item name: 2018102204 Channel name: 1: Average Time 0.1993 min : TOF MS (100-1200) ESI...  
 Item description: ZTB-TS-2

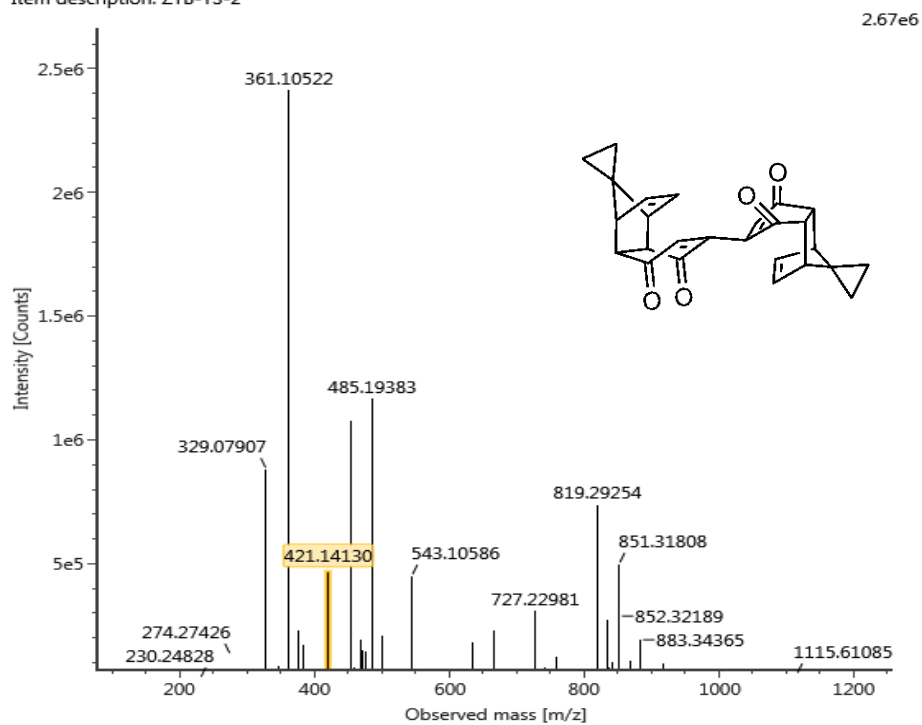

## <sup>1</sup>H NMR spectra of HV-3

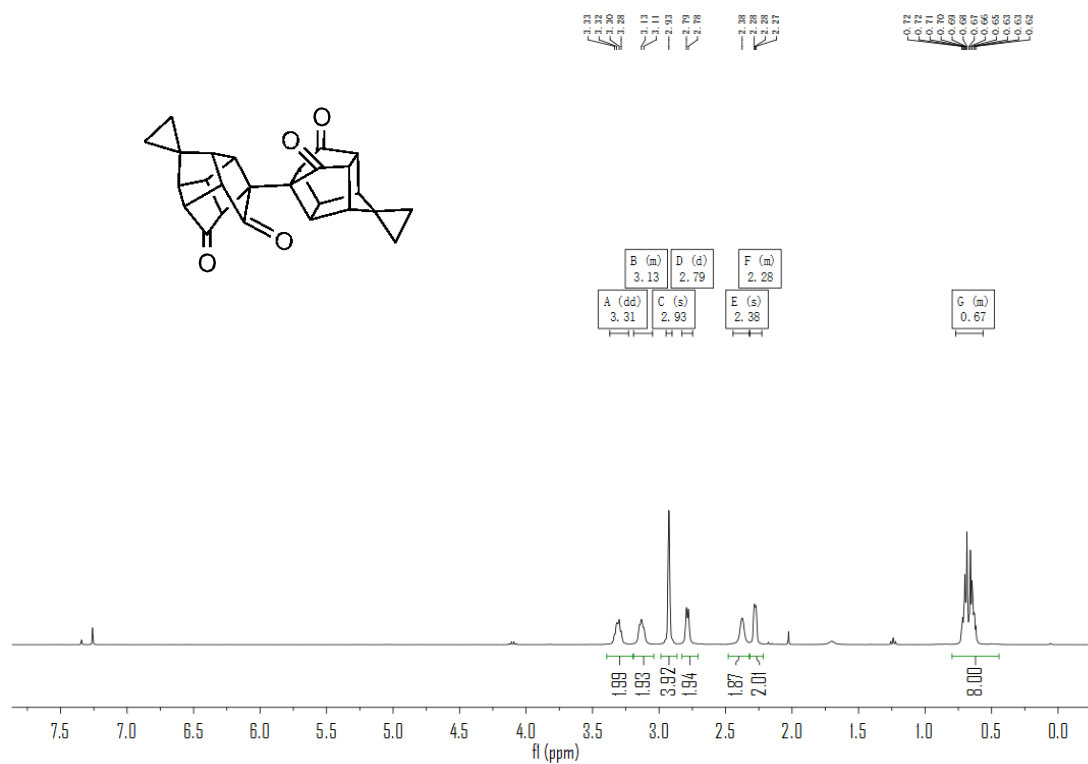

### <sup>13</sup>C NMR spectra of HV-3

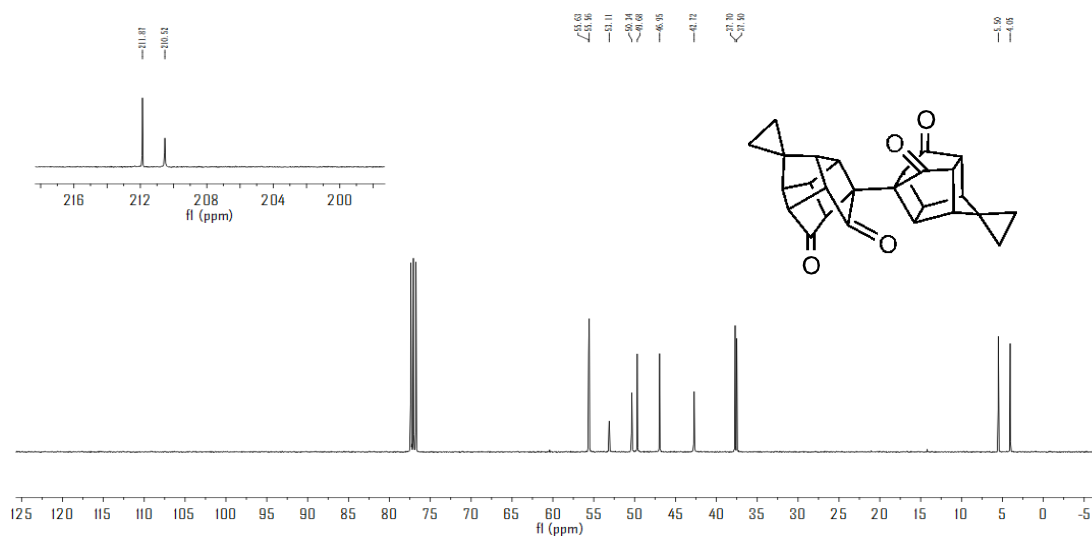

### MS of HV-3

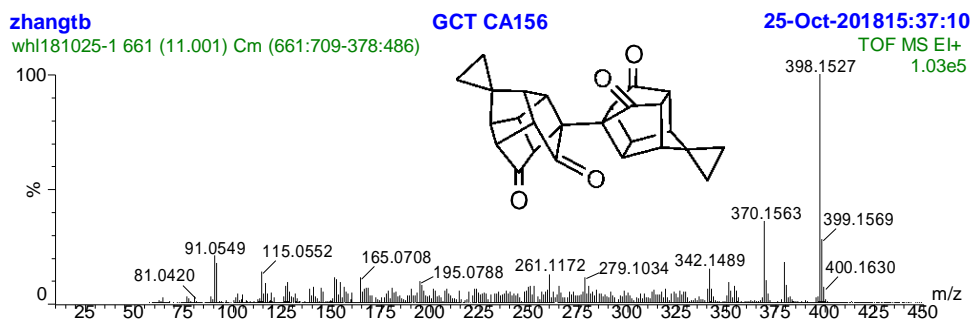

### <sup>1</sup>H NMR spectra of HV-4

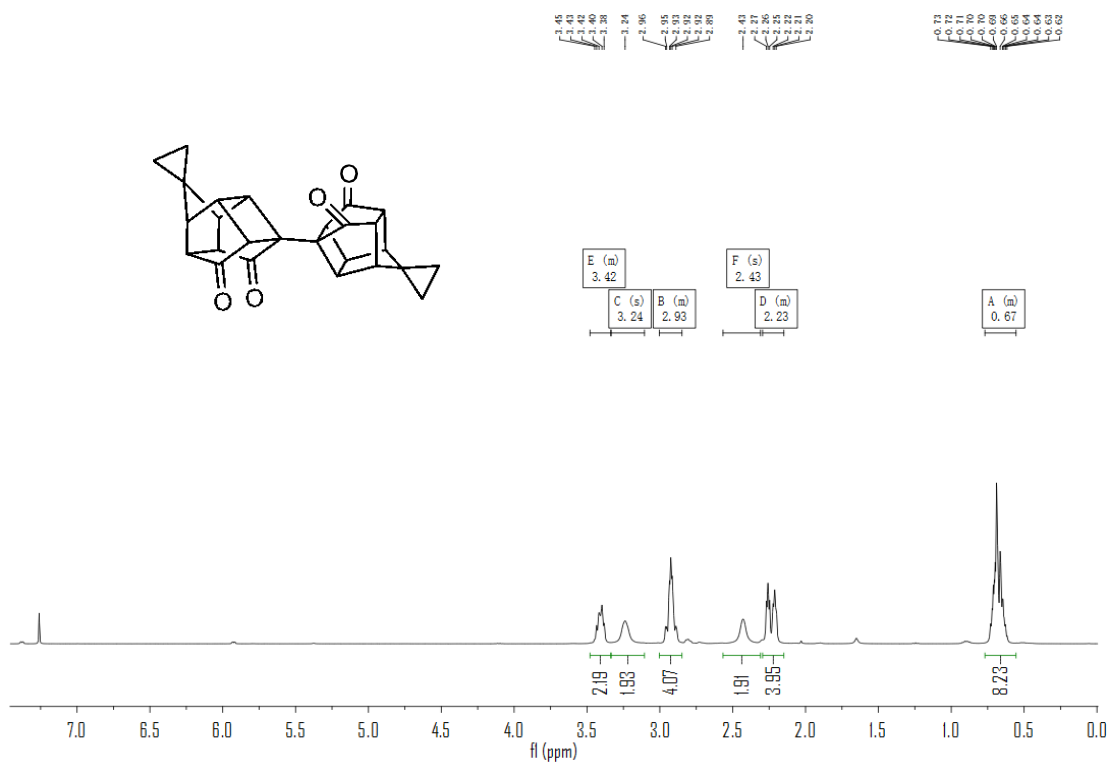

### <sup>13</sup>C NMR spectra of HV-4

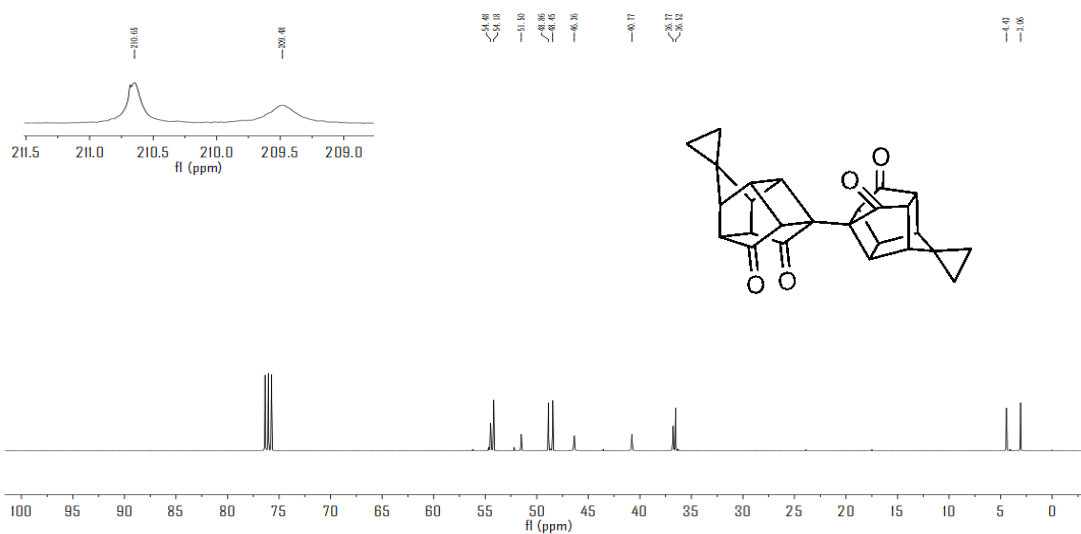

### MS of HV-4

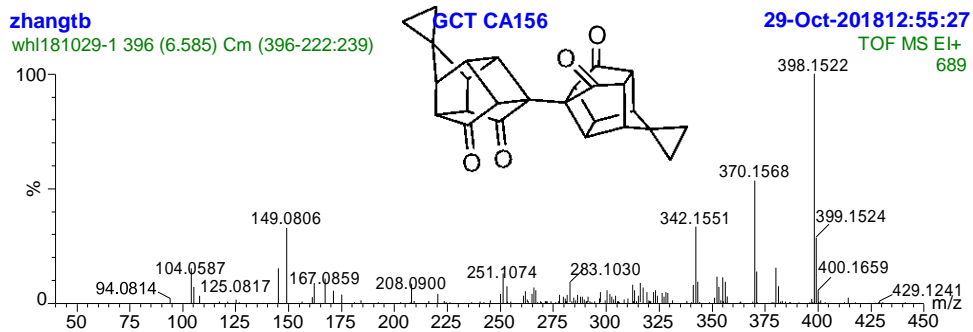

Supplement: c9ra09745g1.pdf [file c9ra09745g1.pdf]
